# Supplementary material for: Chemical space exploration guided by deep neural networks
Source: PubMed Central journal article supplement — RSC Adv. 2019 Feb 11;9(9):5151–7. doi: 10.1039/c8ra10182e (PMC9060647; doi:10.1039/c8ra10182e), 2019-02-11
Supplement: RA-009-C8RA10182E-s001.pdf [file RA-009-C8RA10182E-s001.pdf]

# Supporting Information for “Chemical space exploration guided by deep neural networks”

Dmitry Karlov,<sup>†</sup> Sergey Sosnin,<sup>†</sup> Igor V. Tetko,<sup>‡</sup> and Maxim V. Fedorov<sup>\*,†</sup>

<sup>†</sup>*Skolkovo Institute of Science and Technology, Skolkovo Innovation Center, Moscow  
143026, Russia*

<sup>‡</sup>*Helmholtz Zentrum München - Research Center for Environmental Health (GmbH),  
Institute of Structural Biology, Ingolstädter Landstraße 1, D-85764 Neuherberg Germany*

E-mail: m.fedorov@skoltech.ru

## The architecture of our encoding ANN

The structure of our neural network is presented in *Table 1*. To train our network we used Adam optimizer with  $learning\_rate = 10^{-5}$ . Neural networks training was performed using PyTorch 0.4 [<https://pytorch.org/>] with NVIDIA GeForce GTX 1080 Ti (Driver Version 390.42, CUDA V8.0.61). The parameters provided the best performance are listed in *Table 2*. The grid search space are given in *Table 3*.

Table 1: The architecture of the used neural network

| Layer  | Neurons | Batch Normalization |
|--------|---------|---------------------|
| Input  | 2048    | Yes                 |
| 1      | 1024    | Yes                 |
| 2      | 1024    | Yes                 |
| 3      | 1024    | Yes                 |
| Output | 2       | No                  |

## Results

### ML methods parameters

Table 2: The optimal hyperparameters of classifiers both found by grid search optimization and default

| Descriptor set    | ML method     | Parameters                                                              |                                                                        |
|-------------------|---------------|-------------------------------------------------------------------------|------------------------------------------------------------------------|
|                   |               | GPCR ligands                                                            | NR ligands                                                             |
| ECFP6 descriptors | kNN           | n_neighbours = 24<br>weights = all_equal                                | n_neighbours = 9<br>weights = all_equal                                |
|                   | SVM           | C = 0.015625<br>kernel = linear                                         | C = 0.01562<br>kernel = linear                                         |
|                   | XGBoost       | learning_rate = 0.05<br>l2 = 0.01<br>max_depth = 3<br>n_estimators = 10 | learning_rate = 0.05<br>l2 = 1.<br>max_depth = 3<br>n_estimators = 100 |
|                   | Random forest | max_features = all<br>min_sample_leaf = 10                              | max_features = sqrt(all)<br>min_sample_leaf = 100                      |
| pTSNE mapping     | kNN           | n_neighbours = 24<br>weights = all_equal<br>C = 64                      | n_neighbours = 9<br>weights = all_equal<br>C = 0.25                    |
|                   | SVM           | kernel = polynomial<br>gamma = 0.001<br>learning_rate = 0.05            | Kernel = rbf<br>gamma = 0.003<br>learning_rate = 0.05                  |
|                   | XGBoost       | l2 = 0.001<br>max_depth = 3<br>n_estimators = 10                        | l2 = 0.01<br>max_depth = 3<br>n_estimators = 300                       |
|                   | Random forest | max_features = all<br>min_sample_leaf = 10                              | max_features = auto<br>min_sample_leaf = 10                            |
| PCA mapping       | kNN           | n_neighbours = 24<br>weights = all_equal                                | n_neighbours = 9<br>weights = all_equal                                |
|                   | SVM           | l2 = 0.015625<br>kernel = linear                                        | l2 = 0.015625<br>kernel = linear                                       |
|                   | XGBoost       | learning_rate = 0.05<br>l2 = 0.1<br>max_depth = 3<br>n_estimators = 10  | learning_rate = 0.05<br>l2 = 1.<br>max_depth = 3<br>n_estimators = 13  |
|                   | Random forest | max_features = all<br>min_sample_leaf = 10                              | max_features = sqrt(all)<br>min_sample_leaf = 100                      |
| MDS mapping       | kNN           | n_neighbours = 24<br>weights = all_equal<br>l2 = 0.015625               | n_neighbours = 9<br>weights = all_equal<br>l2 = 0.015625               |
|                   | SVM           | kernel = linear<br>learning_rate = 0.05                                 | kernel = linear<br>learning_rate = 0.05                                |
|                   | XGBoost       | l2 = 1.<br>max_depth = 4<br>n_estimators = 3000                         | l2 = 1.<br>max_depth = 3<br>n_estimators = 300                         |
|                   | Random forest | max_features = log2(all)<br>min_sample_leaf = 100                       | max_features = all<br>min_sample_leaf = 30                             |

Table 3: Sets of parameters for grid search procedure

| Method  | Parameter                            | Values                                               |
|---------|--------------------------------------|------------------------------------------------------|
| kNN     | Number of neighbors to consider      | 1, 3, 9, 12, 15, 18, 21, 24, 27, 30                  |
|         | Distance metric                      | manhattan                                            |
|         | weights for neighbours               | all equal, inverse distance                          |
| RF      | Number of estimators                 | 10, 30, 100, 300, 1000, 3000                         |
|         | maximum number of features           | all, sqrt(all), log2(all)                            |
|         | minimum number of samples in leafs   | 10, 30, 100, 300                                     |
| SVM     | constant at L2 penalty               | 0.015625, 0.0625, 0.25, 1, 4, 16, 64, 256, 1024      |
|         | kernel type                          | linear, rbf, polynomial of degree 3                  |
|         | kernel coefficient (rbf, polinomial) | 0.01, 0.003, 0.001, 0.0003, 0.0001, 0.00003, 0.00001 |
| XGBoost | booster                              | gbtree                                               |
|         | learning rate                        | 0.05, 0.1, 0.15, 0.2, 0.25, 0.3                      |
|         | max depth                            | 3, 4, 5, 6, 7, 8, 9                                  |
|         | L2 penalty                           | 0.001, 0.01, 0.1, 1, 10                              |
